# Supplementary material for: A near-infrared fluorescence enhancement strategy of amorphous silicon nanoparticles for night vision imaging and visualizing latent fingerprints
Source: Royal Society of Chemistry journal article supplement (doi:10.1039/d4tc01920b), 2024-01-01
Supplement: d4tc01920b1.pdf [file d4tc01920b1.pdf]

# Near-Infrared Fluorescence Enhancement Strategy of Amorphous Silicon Nanoparticles for Night Vision Imaging and Visualizing Latent Fingerprints

Qian Zhang<sup>1</sup>, Wanyin Ge<sup>1,\*</sup>, Yunting Wang<sup>2</sup>, Di Han<sup>2</sup>, Maohao Yang<sup>1</sup>, Xin Xie<sup>1</sup>, Peng He<sup>1</sup>, Honglei Yin<sup>1</sup>

<sup>1</sup> School of Materials Science and Engineering, School of Antiquities Preservation Science & Technology, Shaanxi University of Science and Technology, Xi'an, Shaanxi 710021, P. R. China.

<sup>2</sup> Materials Institute of Atomic and Molecular Science, Shaanxi University of Science and Technology, Xi'an, Shaanxi 710021, P. R. China.

\* Corresponding author. Email address: [gewanyin@sust.edu.cn](mailto:gewanyin@sust.edu.cn)

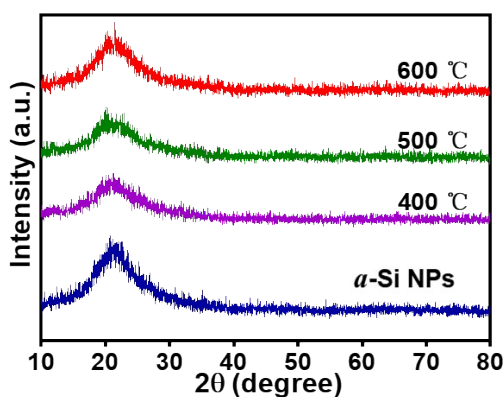

Figure S1. XRD pattern of nanoparticles annealed at various temperature.

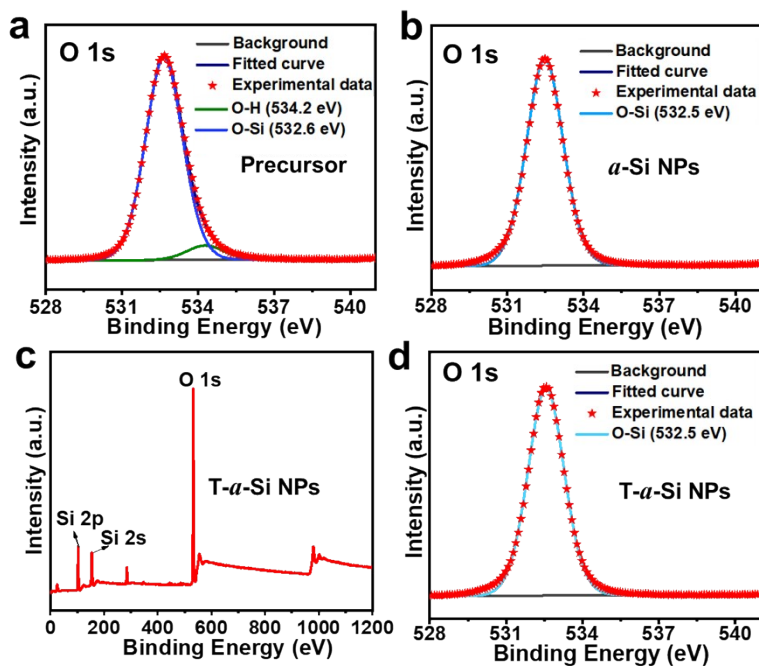

Figure S2. (a) XPS spectra of the O 1s orbital for precursor; (b) XPS spectra of the O 1s orbital for a-Si NPs; (c) XPS full spectra of a-Si NPs; (d) XPS spectra of the O 1s orbital for T-a-Si NPs.

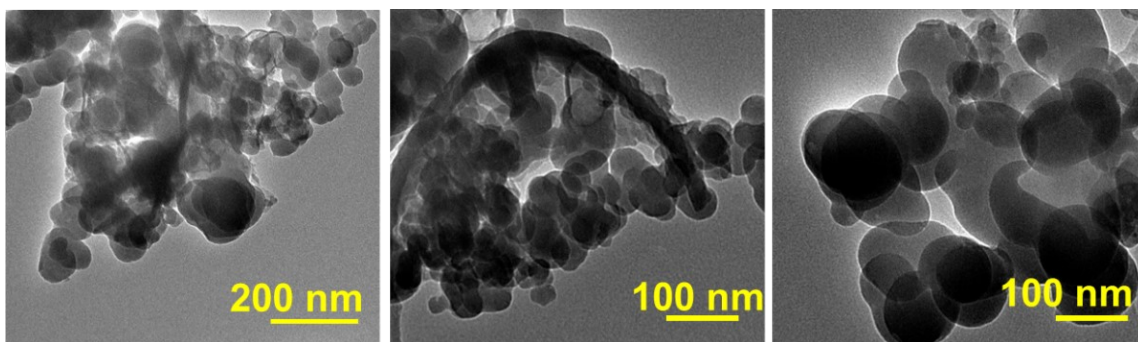

Figure S3. TEM image of the precursor.

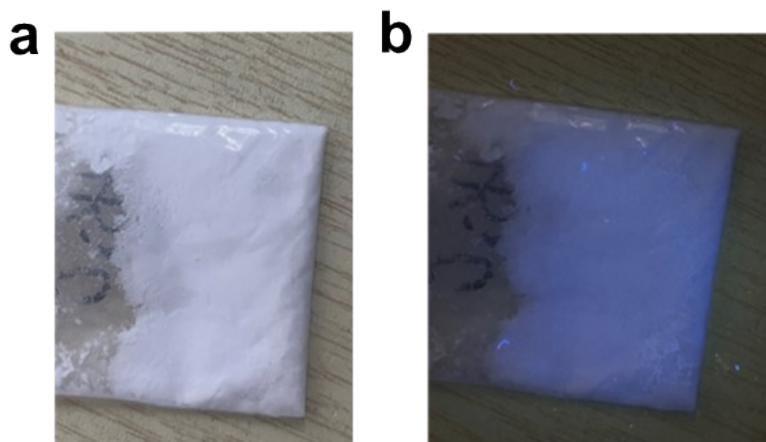

Figure S4. (a) Photographs of precursor under natural light; (b) Photographs of precursor excited by 365 nm light source.

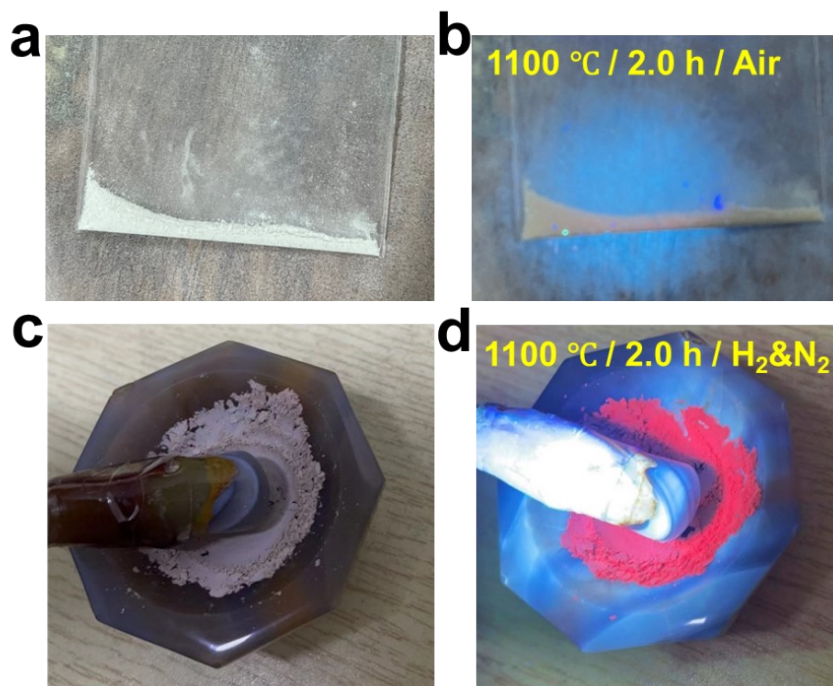

Figure S5. Annealing in air (a) Natural light; (b) Photographs excited by 365 nm light source; Annealing in a mixture of hydrogen and nitrogen (c) Natural light; (d) Photographs excited by 365 nm light source.

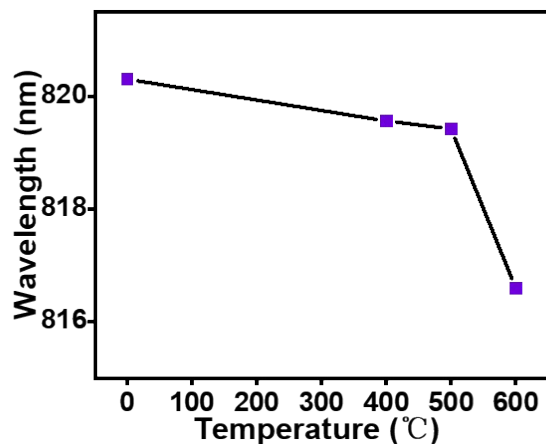

Figure S6. The dot plot of secondary annealing temperature and emission peak position.

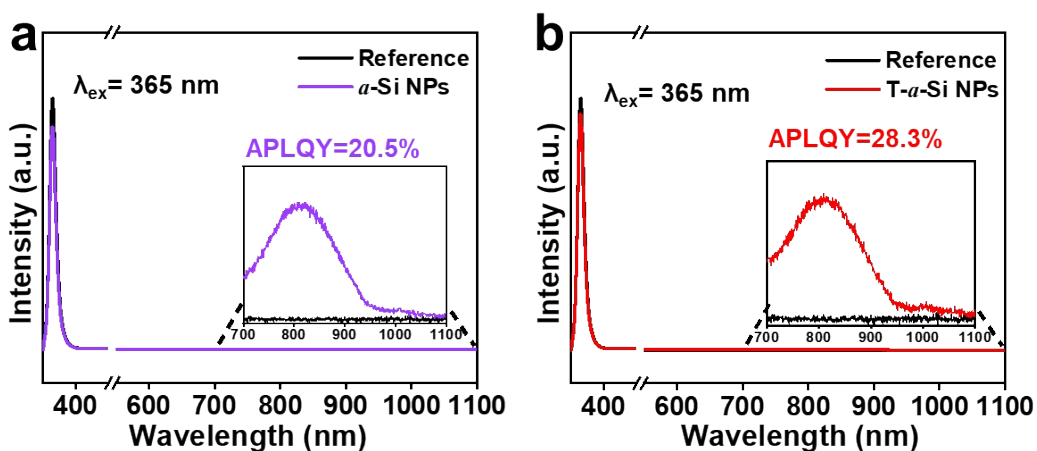

Figure S7. The absolute photoluminescence quantum yield of *a*-Si NPs and T-*a*-Si NPs.

Table S1. Comparison of fluorescence yield of different silicon nanomaterials.

| Silicon nanomaterials            | Synthesis method                    | PL emission peak (nm) | Size (nm)       | PLQY (%) | Ref |
|----------------------------------|-------------------------------------|-----------------------|-----------------|----------|-----|
| Si QD                            | $\gamma$ -ray irradiation technique | 395                   | 1.3 $\pm$ 0.22  | 14.6     | 1   |
| Au NP-Si QD                      | one-pot synthetic route             | 467                   | 3.6             | 3.1      | 2   |
| <i>a</i> -Si NW                  | electrodeposition in ionic liquids  | 780                   | 110             | >25      | 3   |
| Si QD                            | convert waste                       | 680                   | 3               | 21       | 4   |
| R-Si QDs                         | thermal hydrosilylation             | 410                   | 2.5 $\pm$ 0.73  | 5.8      | 5   |
| B-Si QDs                         | under argon gas                     | 700                   | 5.1 $\pm$ 0.68  | 34.6     |     |
| Si QD-S                          | self-limited self-assembly process  | 790                   | 100             | 12.8     | 6   |
| Metal-doped SiNCs (M=Ni, Mn, Co) | gel thermal disproportionation      | 992 (Ni)              | 8.75 $\pm$ 3.25 | 5        | 7   |
|                                  |                                     | 985 (Mn)              | 7.5 $\pm$ 1.5   | 8        |     |
|                                  |                                     | 1000 (Co)             | 7.3 $\pm$ 1.3   | 26       |     |

|                     |                                               |         |       |      |              |
|---------------------|-----------------------------------------------|---------|-------|------|--------------|
| Vinyl-POSS-ncSi     | thermal hydrosilylation,<br>thermal           | 850-900 |       | 11.8 | 8            |
| <i>a</i> -Si NPs    | sol-gel derived polymer and<br>heat treatment | 820     | 19-25 | 20.5 | this<br>work |
| T- <i>a</i> -Si NPs |                                               | 820     | 18-22 | 28.3 |              |

Note: Silicon quantum dot (Si QD); Amorphous Si nanowires (*a*-Si NW); Blue/ Red emission silicon quantum dot (R/B-Si QDs); Silicon quantum dot supraparticles (Si QD-S); POSS polymer composites with silicon nanocrystals (Vinyl-POSS-ncSi).

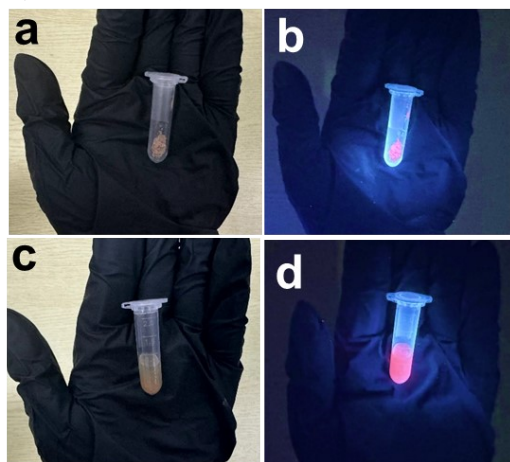

Figure S8. Photographs of T-*a*-Si NPs excited by natural light (a) and 365 nm light source (b); Photographs of T-*a*-Si NP in water under the excitation of natural light (c) and 365 nm light (d).

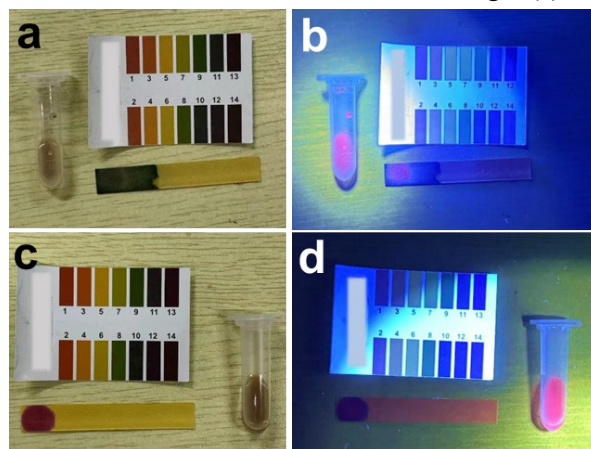

Figure S9. The pH contrast diagram of T-*a*-Si NPs in hydrochloric acid solution under the excitation of natural light (a) and 365 nm light source (b); The pH contrast diagram of T-*a*-Si NPs in ammonia aqueous solution was excited by natural light (c) and 365 nm light source (d).

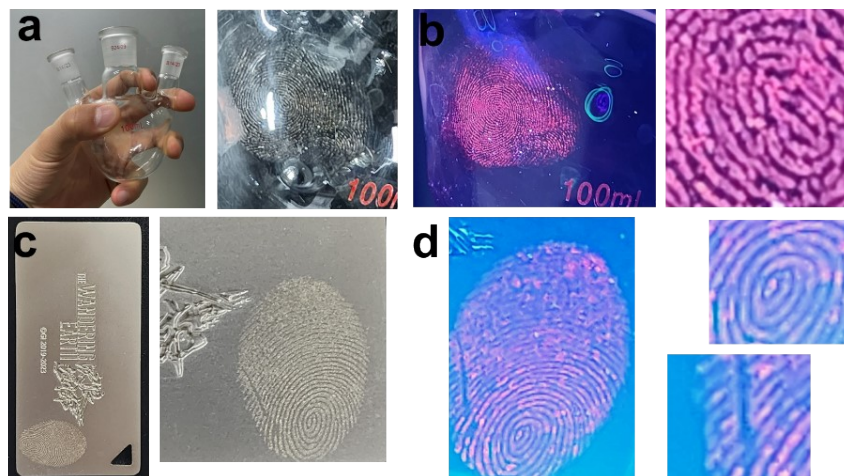

Figure S10. (a) Photos of round-bottom flask fingerprints under natural light; (b) Photographs of round-bottom flask fingerprints excited by 365 nm light source; (c) Photographs of metal card fingerprints under natural light; (d) Photographs of metal card fingerprints excited by 365 nm light source.

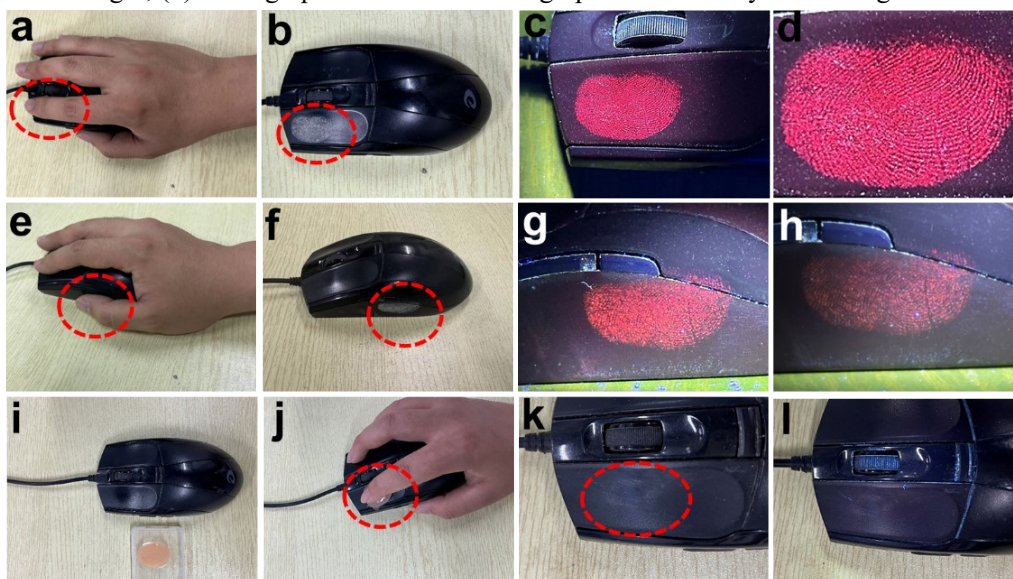

Figure S11. (a) (e) Photos of operating the mouse; (b) (f) (k) T-a-Si NPs powder after spraying and blowing away the floating powder; (c) (d) (g) Fingerprint photo excited by 365 nm light source; (h) The fingerprint photo excited by the 365 nm light source after blowing away part of the powder in the Figure S9j; (i) Fingerprints of mouse and silica gel mold; (j) Silica gel mold fingerprint operation mouse photos ; (l) 365 nm light source excitation k fingerprint photo.

## References

1. Guleria, A.; Neogy, S.; Maurya, D. K.; Adhikari, S., Blue Light-Emitting Si Quantum Dots with Mesoporous and Amorphous Features: Origin of Photoluminescence and Potential Applications. *Journal of Physical Chemistry C* **2017**, *121* (43), 24302-24316.
2. Sharma, B.; Tanwar, S.; Sen, T., One Pot Green Synthesis of Si Quantum Dots and Catalytic Au Nanoparticle-Si Quantum Dot Nanocomposite. *Acs Sustainable*

*Chemistry & Engineering* **2019**, 7 (3), 3309-3318.

3. Thomas, S.; Mallet, J.; Martineau, F.; Rinnert, H.; Molinari, M., Strong Room-Temperature Visible Photoluminescence of Amorphous Si Nanowires Prepared by Electrodeposition in Ionic Liquids. *Acs Photonics* **2018**, 5 (7), 2652-2660.
4. Terada, S.; Ueda, H.; Ono, T.; Saitow, K.-i., Orange-Red Si Quantum Dot LEDs from Recycled Rice Husks. *Acs Sustainable Chemistry & Engineering* **2022**, 10 (5), 1765-1776.
5. Le, T.-H.; Le, D. T. T.; Tung, N. V., Synthesis of Colloidal Silicon Quantum Dot from Rice Husk Ash. *Journal of Chemistry* **2021**, 2021, 6689590.
6. Fujii, M.; Fujii, R.; Takada, M.; Sugimoto, H., Silicon Quantum Dot Supraparticles for Fluorescence Bioimaging. *Acs Applied Nano Materials* **2020**, 3 (6), 6099-6107.
7. Chandra, S.; Masuda, Y.; Shirahata, N.; Winnik, F. M., Transition-Metal-Doped NIR-Emitting Silicon Nanocrystals. *Angewandte Chemie-International Edition* **2017**, 56 (22), 6157-6160.
8. Chen, D.; Sun, W.; Qian, C.; Reyes, L. M.; Wong, A. P. Y.; Dong, Y.; Jia, J.; Chen, K. K.; Ozin, G. A., Porous NIR Photoluminescent Silicon Nanocrystals-POSS Composites. *Advanced Functional Materials* **2016**, 26 (28), 5102-5110.
